# Supplementary material for: Variants in SARS-CoV-2 Associated with Mild or Severe Outcome
Source: bioRxiv or medRxiv preprint supplement (doi:10.1101/2020.12.01.20242149), 2020-12-03
Supplement: Supplementary file [file media-2.pdf]

**Supplementary Table 2. Summary of Variants and Association with Severe Outcome.**

| Variant_Name  | Odds_Ratio | Amino Acid     | Mutation_Type | Variant_Frequency |
|---------------|------------|----------------|---------------|-------------------|
| C29625T       | 0.01       | S23F           | Missense      | 0.0015            |
| C5700A        | 0.02       | A1812D         | Missense      | 0.0155            |
| C1281T        | 0.02       | A339V          | Missense      | 0.0039            |
| C10202T       | 0.03       | L3313F         | Missense      | 0.0012            |
| G5554T        | 0.04       | K1763N         | Missense      | 0.0045            |
| C9693T        | 0.04       | A3143V         | Missense      | 0.0015            |
| G26233T       | 0.05       |                | Non-coding    | 0.0018            |
| C12003T       | 0.05       | S3913L         | Missense      | 0.0015            |
| T3833G        | 0.06       | F1190V         | Missense      | 0.0009            |
| G20087C       | 0.06       | G6608A         | Missense      | 0.0012            |
| C2558T        | 0.07       | P765S          | Missense      | 0.0033            |
| C17440T       | 0.08       | P5726S         | Missense      | 0.0021            |
| C14757T       | 0.08       | H4831H         | Silent        | 0.0006            |
| A25596G       | 0.09       | R68R           | Silent        | 0.0012            |
| C8818T        | 0.09       | C2851C         | Silent        | 0.0012            |
| C4993T        | 0.09       | N1576N         | Silent        | 0.0006            |
| C3176T        | 0.09       | P971S          | Missense      | 0.0009            |
| T4092C        | 0.09       | I1276T         | Missense      | 0.0006            |
| G16945A       | 0.10       | A5561T         | Missense      | 0.0015            |
| C3634T        | 0.10       | N1123N         | Silent        | 0.0125            |
| C541T         | 0.10       | L92L           | Silent        | 0.0009            |
| G14181A       | 0.10       | L4639L         | Silent        | 0.0009            |
| C19955T       | 0.11       | T6564I         | Missense      | 0.0006            |
| C10868T       | 0.11       | L3535L         | Silent        | 0.0018            |
| C28311T       | 0.14       | P13L           | Missense      | 0.0999            |
| C16323T       | 0.14       | C5353C         | Silent        | 0.0012            |
| C11563T       | 0.14       | C3766C         | Silent        | 0.0009            |
| G20773T       | 0.16       | G6837C         | Missense      | 0.0006            |
| G28878A       | 0.17       | S202N          | Missense      | 0.0143            |
| A3742G        | 0.17       | I1159M         | Missense      | 0.0015            |
| C1707T        | 0.18       | S481F          | Missense      | 0.0009            |
| T9672A        | 0.18       | V3136E         | Missense      | 0.0006            |
| TGTTA26157T   | 0.18       | V256fs         | Frameshift    | 0.0012            |
| G204T         | 0.19       |                | Non-coding    | 0.0012            |
| G18985T       | 0.20       | V6241F         | Missense      | 0.0009            |
| T16732G       | 0.22       | S5490A         | Missense      | 0.0009            |
| G25429T       | 0.23       | V13L           | Missense      | 0.0033            |
| A26134G       | 0.23       | T248A          | Missense      | 0.0006            |
| T9628C        | 0.24       | S3121S         | Silent        | 0.0006            |
| GCGCTTC26350G | 0.24       | A36_R38delinsG | Deletion      | 0.0009            |
| C25466T       | 0.24       | P25L           | Missense      | 0.0021            |
| G28884T       | 0.26       | G204V          | Missense      | 0.0006            |

|         |      |        |            |        |
|---------|------|--------|------------|--------|
| C6354T  | 0.27 | S2030L | Missense   | 0.0009 |
| C25006T | 0.28 | F1148F | Silent     | 0.0015 |
| G29742A | 0.28 |        | Non-coding | 0.0161 |
| T8022G  | 0.31 | V2586G | Missense   | 0.0077 |
| G17808T | 0.32 | K5848N | Missense   | 0.0009 |
| C10507T | 0.33 | N3414N | Silent     | 0.0054 |
| A6507G  | 0.33 | N2081S | Missense   | 0.0018 |
| C29774T | 0.35 |        | Non-coding | 0.0012 |
| G23236T | 0.36 | K558N  | Missense   | 0.0021 |
| T23815C | 0.38 | N751N  | Silent     | 0.0009 |
| T6262C  | 0.38 | N1999N | Silent     | 0.0006 |
| C13454T | 0.38 | Q4397* | Nonsense   | 0.0006 |
| G28321T | 0.39 | T16T   | Silent     | 0.0045 |
| G29734C | 0.41 |        | Non-coding | 0.0059 |
| T23443C | 0.44 | D627D  | Silent     | 0.0018 |
| C21627T | 0.44 | T22I   | Missense   | 0.0033 |
| C3927T  | 0.46 | S1221L | Missense   | 0.0006 |
| T24634C | 0.46 | L1024L | Silent     | 0.0006 |
| C25624T | 0.46 | H78Y   | Missense   | 0.0009 |
| C18877T | 0.47 | L6205L | Silent     | 0.1014 |
| C3373A  | 0.47 | D1036E | Missense   | 0.0039 |
| G25249T | 0.47 | M1229I | Missense   | 0.0030 |
| C379A   | 0.48 | V38V   | Silent     | 0.0033 |
| C3874T  | 0.50 | I1203I | Silent     | 0.0006 |
| C22432T | 0.50 | D290D  | Silent     | 0.0012 |
| C11620T | 0.51 | F3785F | Silent     | 0.0021 |
| C29095T | 0.52 | F274F  | Silent     | 0.0045 |
| G6894T  | 0.53 | C2210F | Missense   | 0.0006 |
| G28881A | 0.53 | R203K  | Missense   | 0.2444 |
| G17014T | 0.54 | D5584Y | Missense   | 0.0015 |
| G12167A | 0.55 | V3968I | Missense   | 0.0006 |
| G28300T | 0.55 | Q9H    | Missense   | 0.0006 |
| C12781T | 0.57 | Y4172Y | Silent     | 0.0009 |
| A178G   | 0.62 |        | Non-coding | 0.0006 |
| A28795G | 0.63 | E174E  | Silent     | 0.0012 |
| G4300T  | 0.64 | V1345V | Silent     | 0.0056 |
| C12809T | 0.68 | L4182F | Missense   | 0.0056 |
| C19018T | 0.70 | P6252S | Missense   | 0.0006 |
| C2113T  | 0.71 | I616I  | Silent     | 0.0059 |
| G8653T  | 0.73 | M2796I | Missense   | 0.0030 |
| A3039G  | 0.73 | Y925C  | Missense   | 0.0012 |
| G21795T | 0.76 | R78M   | Missense   | 0.0015 |
| A8628G  | 0.76 | Y2788C | Missense   | 0.0006 |
| A2568G  | 0.77 | Q768R  | Missense   | 0.0006 |
| C27046T | 0.78 | T175M  | Missense   | 0.0045 |

|           |      |        |            |        |
|-----------|------|--------|------------|--------|
| A18052G   | 0.79 | T5930A | Missense   | 0.0012 |
| G22468T   | 0.79 | T302T  | Silent     | 0.0158 |
| C2416T    | 0.80 | Y717Y  | Silent     | 0.0137 |
| G20134T   | 0.83 | V6624L | Missense   | 0.0009 |
| T17247C   | 0.86 | R5661R | Silent     | 0.0039 |
| G2879A    | 0.87 | A872T  | Missense   | 0.0006 |
| C313T     | 0.87 | L16L   | Silent     | 0.0297 |
| C12242T   | 0.87 | R3993C | Missense   | 0.0009 |
| G3892T    | 0.88 | E1209D | Missense   | 0.0006 |
| G11083T   | 0.88 | L3606F | Missense   | 0.1385 |
| C4679T    | 0.89 | P1472S | Missense   | 0.0009 |
| G8371T    | 0.90 | Q2702H | Missense   | 0.0042 |
| A19422G   | 0.91 | S6386S | Silent     | 0.0009 |
| C8352T    | 0.93 | A2696V | Missense   | 0.0006 |
| G1820A    | 0.95 | G519S  | Missense   | 0.0015 |
| C17403T   | 0.96 | A5713A | Silent     | 0.0009 |
| C27813T   | 0.96 | L20F   | Missense   | 0.0009 |
| G25641T   | 0.96 | L83F   | Missense   | 0.0006 |
| T312C     | 0.97 | L16P   | Missense   | 0.0006 |
| T27384C   | 0.97 | D61D   | Silent     | 0.0021 |
| T19632C   | 0.98 | N6456N | Silent     | 0.0006 |
| G15652T   | 0.99 | D5130Y | Missense   | 0.0018 |
| A17645T   | 1.00 | Q5794L | Missense   | 0.0009 |
| C6445T    | 1.00 | D2060D | Silent     | 0.0018 |
| ATG29866A | 1.01 |        | Non-coding | 0.0027 |
| A10874G   | 1.01 | N3537D | Missense   | 0.0018 |
| C26625T   | 1.02 | L35L   | Silent     | 0.0012 |
| C13536T   | 1.03 | Y4424Y | Silent     | 0.0080 |
| C3317T    | 1.05 | P1018S | Missense   | 0.0006 |
| G29474T   | 1.05 | D401Y  | Missense   | 0.0015 |
| C1191T    | 1.05 | P309L  | Missense   | 0.0045 |
| G1141T    | 1.05 | K292N  | Missense   | 0.0018 |
| G10360A   | 1.05 | K3365K | Silent     | 0.0006 |
| T7621C    | 1.13 | C2452C | Silent     | 0.0065 |
| C875T     | 1.15 | L204F  | Missense   | 0.0012 |
| C4582T    | 1.15 | N1439N | Silent     | 0.0012 |
| A20268G   | 1.17 | L6668L | Silent     | 0.0473 |
| C1917T    | 1.20 | T551I  | Missense   | 0.0012 |
| C1059T    | 1.21 | T265I  | Missense   | 0.0847 |
| T13006C   | 1.21 | A4247A | Silent     | 0.0042 |
| C3037T    | 1.23 | F924F  | Silent     | 0.6153 |
| G28883C   | 1.24 | G204R  | Missense   | 0.2420 |
| A10948G   | 1.24 | R3561R | Silent     | 0.0024 |
| C10702T   | 1.30 | D3479D | Silent     | 0.0006 |
| G27415T   | 1.34 | A8S    | Missense   | 0.0027 |

|         |       |        |            |        |
|---------|-------|--------|------------|--------|
| C3686T  | 1.38  | H1141Y | Missense   | 0.0048 |
| G14122T | 1.41  | G4620C | Missense   | 0.0027 |
| C23929T | 1.42  | Y789Y  | Silent     | 0.0990 |
| C28854T | 1.44  | S194L  | Missense   | 0.0369 |
| C241T   | 1.50  |        | Non-coding | 0.6201 |
| A29700G | 1.52  |        | Non-coding | 0.0036 |
| C14408T | 1.58  | P4715L | Missense   | 0.6147 |
| T9172C  | 1.58  | L2969L | Silent     | 0.0024 |
| C8326T  | 1.59  | D2687D | Silent     | 0.0042 |
| C27964T | 1.61  | S24L   | Missense   | 0.0095 |
| C25708T | 1.64  | L106F  | Missense   | 0.0012 |
| A23403G | 1.71  | D614G  | Missense   | 0.6118 |
| T28144C | 1.73  | L84S   | Missense   | 0.0425 |
| G21255C | 1.75  | A6997A | Silent     | 0.0012 |
| C8782T  | 1.79  | S2839S | Silent     | 0.0437 |
| C26750T | 1.80  | I76I   | Silent     | 0.0065 |
| C9438T  | 1.81  | T3058I | Missense   | 0.0027 |
| C4543T  | 1.82  | T1426T | Silent     | 0.0030 |
| G26730T | 1.88  | V70F   | Missense   | 0.0024 |
| C6040T  | 1.93  | F1925F | Silent     | 0.0048 |
| C26735T | 2.01  | Y71Y   | Silent     | 0.0844 |
| T29148C | 2.61  | I292T  | Missense   | 0.0276 |
| C28076T | 2.62  | C61C   | Silent     | 0.0009 |
| C28657T | 2.67  | D128D  | Silent     | 0.0166 |
| G29616T | 2.70  | R20I   | Missense   | 0.0116 |
| C29870A | 2.73  |        | Non-coding | 0.0059 |
| C8139T  | 2.92  | S2625F | Missense   | 0.0027 |
| C10319T | 3.02  | L3352F | Missense   | 0.0042 |
| T27299C | 3.21  | I33T   | Missense   | 0.0271 |
| C10188T | 3.36  | T3308I | Missense   | 0.0033 |
| G29711T | 3.58  |        | Non-coding | 0.0009 |
| C23185T | 3.98  | F541F  | Silent     | 0.0152 |
| C6310A  | 4.25  | S2015R | Missense   | 0.0488 |
| G26144T | 4.27  | G251V  | Missense   | 0.0294 |
| C25549T | 5.18  | L53F   | Missense   | 0.0051 |
| C13620T | 5.86  | D4452D | Silent     | 0.0071 |
| G25088T | 74.64 | V1176F | Missense   | 0.0369 |
